# Supplementary material for: Evaluation of the impact of the ARC program on national nursing and midwifery regulations, leadership, and organizational capacity in East, Central, and Southern Africa
Source: Springer Nature journal article supplement (doi:10.1186/s12913-018-3233-4), 2018-06-04
Supplement: MOESM1 [file 15817200]

### Additional File 1: Regulatory Function Framework

|                                                         | STAGE 1                                                                                                                                                                                                                                                                      | STAGE 2                                                                                                                                                                                                                                                                                                   | STAGE 3                                                                                                                                                                                                                                                                                                                               | STAGE 4                                                                                                                                                                                                                                                                                                                                  | STAGE 5                                                                                                                                                                                                                                                                                                                                           |
|---------------------------------------------------------|------------------------------------------------------------------------------------------------------------------------------------------------------------------------------------------------------------------------------------------------------------------------------|-----------------------------------------------------------------------------------------------------------------------------------------------------------------------------------------------------------------------------------------------------------------------------------------------------------|---------------------------------------------------------------------------------------------------------------------------------------------------------------------------------------------------------------------------------------------------------------------------------------------------------------------------------------|------------------------------------------------------------------------------------------------------------------------------------------------------------------------------------------------------------------------------------------------------------------------------------------------------------------------------------------|---------------------------------------------------------------------------------------------------------------------------------------------------------------------------------------------------------------------------------------------------------------------------------------------------------------------------------------------------|
| <b>Nursing and Midwifery Legislation</b>                | <input type="checkbox"/> Identification of key issues with participation of stakeholders.<br><br><input type="checkbox"/> Consensus around whether a new nursing and midwifery Act or amendments to existing legislation are needed.                                         | <input type="checkbox"/> Legislation drafted with stakeholders including Ministry of Health, nursing and midwifery council and/or professional associations, academia, and legislature or parliament.                                                                                                     | <input type="checkbox"/> Approval, commencement, and publication of legislation.                                                                                                                                                                                                                                                      | <input type="checkbox"/> Implementation through dissemination and training of nurses and midwives in their rights and duties.<br><br><input type="checkbox"/> Issuance by Councils and/or Ministry of Health of rules or regulations.                                                                                                    | <input type="checkbox"/> Monitoring and evaluation of compliance and impact.                                                                                                                                                                                                                                                                      |
| <b>Registration System and Use of Registration Data</b> | <input type="checkbox"/> Registration is not legally required for nurses and midwives to practice<br>OR<br><input type="checkbox"/> Registration is lifelong (i.e. renewal is not required).<br><br><input type="checkbox"/> The register is primarily a paper-based system. | <input type="checkbox"/> Renewal of registration (or license) is required.<br><br><input type="checkbox"/> Both paper and electronic (e.g. Excel) system for registration is used.<br><br><input type="checkbox"/> Registration system can answer basic queries (e.g. number of midwives in the country). | <input type="checkbox"/> Registration system (including licensure and re-licensure) is primarily electronic (use of software).<br><br><input type="checkbox"/> Database includes all public sector nurses and is regularly updated.<br><br><input type="checkbox"/> Registration system can be queried to generate workforce reports. | <input type="checkbox"/> Registration system is completely electronic and includes all public and private sector nurses.<br><br><input type="checkbox"/> Database displays various registration statuses of nurses and midwives.<br><br><input type="checkbox"/> Database can be programmed to automatically generate workforce reports. | <input type="checkbox"/> Registration, licensure and re-licensure services are available online or are decentralized.<br><br><input type="checkbox"/> Registration database can exchange data with other health information systems.<br><br><input type="checkbox"/> Registration data used by decision makers for workforce policy and planning. |

|                                                  | STAGE 1                                                                                                                                                                                           | STAGE 2                                                                                                                                                                                                                                                                     | STAGE 3                                                                                                                                                                                                                                                                                   | STAGE 4                                                                                                                                                                                                                                                                                                                                 | STAGE 5                                                                                                                                                                                                                                                                                                                                                                 |
|--------------------------------------------------|---------------------------------------------------------------------------------------------------------------------------------------------------------------------------------------------------|-----------------------------------------------------------------------------------------------------------------------------------------------------------------------------------------------------------------------------------------------------------------------------|-------------------------------------------------------------------------------------------------------------------------------------------------------------------------------------------------------------------------------------------------------------------------------------------|-----------------------------------------------------------------------------------------------------------------------------------------------------------------------------------------------------------------------------------------------------------------------------------------------------------------------------------------|-------------------------------------------------------------------------------------------------------------------------------------------------------------------------------------------------------------------------------------------------------------------------------------------------------------------------------------------------------------------------|
| <b>Licensure Process</b>                         | <input type="checkbox"/> Licenses not required to practice                                                                                                                                        | <input type="checkbox"/> Licenses are issued with initial registration (no separate licensure examination).<br><br><input type="checkbox"/> Renewal of license is required at intervals specified by the regulatory authority.                                              | <input type="checkbox"/> An examination or assessment process is in place for initial registration and licensure.<br><br><input type="checkbox"/> The examination or assessment is paper-based.<br><br><input type="checkbox"/> National competency standards are being developed.        | <input type="checkbox"/> Examination or assessment content meets national competency standards.<br><br><input type="checkbox"/> Various statuses of licenses issued (i.e. conditional, suspended).<br><br><input type="checkbox"/> Licensure verification process facilitates entry of foreign educated nurses/midwives into workforce. | <input type="checkbox"/> Registration and initial licensure examination content is updated regularly.<br><br><input type="checkbox"/> Examination content aligns with global guidelines or regional competency standards.<br><br><input type="checkbox"/> The licensure status of a nurse or midwife is available to the public either via website, phone or in-person. |
| <b>Scope of Practice (SOP)</b>                   | <input type="checkbox"/> SOP not defined by legal statute or regulation.<br><br><input type="checkbox"/> SOP may be decided by the employer or based on health facility needs.                    | <input type="checkbox"/> Council has the authority to formally define the SOP.<br><br><input type="checkbox"/> SOP are under development.<br><br><input type="checkbox"/> SOP reviewed or revised within 10 years.                                                          | <input type="checkbox"/> Nationally standardized SOP for all nurse and midwife categories.<br><br><input type="checkbox"/> SOP is based on nursing/midwifery context, consultations and job descriptions.<br><br><input type="checkbox"/> SOP reviewed or revised within last five years. | <input type="checkbox"/> SOP includes essential nursing/midwifery competencies.<br><br><input type="checkbox"/> SOP is regularly and systematically reviewed and revised.<br><br><input type="checkbox"/> SOP allows for individuals to make decisions about task shifting or task sharing.                                             | <input type="checkbox"/> All SOP align with global guidelines and standards for nursing and midwifery.<br><br><input type="checkbox"/> SOP reviewed and revised according to global standards.<br><br><input type="checkbox"/> SOP is dynamic, flexible, and inclusive, not restrictive.                                                                                |
| <b>Continuing Professional Development (CPD)</b> | <input type="checkbox"/> CPD does not exist.<br><br><input type="checkbox"/> CPD is voluntary.<br><br><input type="checkbox"/> CPD framework for nursing and midwifery may be in planning stages. | <input type="checkbox"/> Council has a mandate in legislation to require CPD.<br><br><input type="checkbox"/> National CPD framework for nursing and midwifery is developed.<br><br><input type="checkbox"/> Implementation of CPD requirement is in pilot or early stages. | <input type="checkbox"/> CPD program for nurses and midwives is finalized and nationally disseminated.<br><br><input type="checkbox"/> CPD is officially required for re-licensure.<br><br><input type="checkbox"/> Strategy in place to promote and track compliance.                    | <input type="checkbox"/> Electronic system in place to monitor CPD compliance.<br><br><input type="checkbox"/> Penalties for non-compliance with CPD exist.<br><br><input type="checkbox"/> Available CPD includes content on national HIV service delivery guidelines for nurses and midwives.                                         | <input type="checkbox"/> Multiple types of CPD are available including web-based and mobile-based models.<br><br><input type="checkbox"/> CPD content aligns with regional standards or global guidelines.<br><br><input type="checkbox"/> Regular evaluations of CPD program carried out.                                                                              |

|                                                        | STAGE 1                                                                                                                                                                                                                | STAGE 2                                                                                                                                                                                                                                                                                                      | STAGE 3                                                                                                                                                                                                                                                                                             | STAGE 4                                                                                                                                                                                                                                                                                                                         | STAGE 5                                                                                                                                                                                                                                                                                                                                  |
|--------------------------------------------------------|------------------------------------------------------------------------------------------------------------------------------------------------------------------------------------------------------------------------|--------------------------------------------------------------------------------------------------------------------------------------------------------------------------------------------------------------------------------------------------------------------------------------------------------------|-----------------------------------------------------------------------------------------------------------------------------------------------------------------------------------------------------------------------------------------------------------------------------------------------------|---------------------------------------------------------------------------------------------------------------------------------------------------------------------------------------------------------------------------------------------------------------------------------------------------------------------------------|------------------------------------------------------------------------------------------------------------------------------------------------------------------------------------------------------------------------------------------------------------------------------------------------------------------------------------------|
| <b>Accreditation of Pre-Service Education</b>          | <input type="checkbox"/> Council does not have legal authority to approve pre-service nursing/midwifery schools or programs.<br><br><input type="checkbox"/> Public schools/programs may be “endorsed” by the council. | <input type="checkbox"/> Council has legal authority to approve pre-service schools/programs.<br><br><input type="checkbox"/> Council issues standards for accreditation of nursing schools/programs.<br><br><input type="checkbox"/> No time limit or expiration date on accreditation approval.            | <input type="checkbox"/> Initial assessment visits are carried out by the council or their designated authority.<br><br><input type="checkbox"/> Standards for accreditation are regularly reviewed and revised.<br><br><input type="checkbox"/> Requirement for accreditation renewal is enforced. | <input type="checkbox"/> Assessment visits are regularly carried out by an independent body.<br><br><input type="checkbox"/> Council has an electronic system to track accreditation status.<br><br><input type="checkbox"/> Various levels of accreditation granted (i.e. probationary, conditional).                          | <input type="checkbox"/> Group independent from council makes accreditation determination for both public and private schools/programs.<br><br><input type="checkbox"/> Accreditation standards align with global or regional guidelines.<br><br><input type="checkbox"/> Accreditation status available to the public.                  |
| <b>Professional Misconduct and Disciplinary Powers</b> | <input type="checkbox"/> Council does not have authority to manage complaints and impose sanctions.<br><br><input type="checkbox"/> Standards of professional conduct may not be defined.                              | <input type="checkbox"/> Legislation authorizes council to define standards for professional conduct.<br><br><input type="checkbox"/> Council has authority to investigate or initiate inquiries into professional misconduct.<br><br><input type="checkbox"/> Basic types of complaints and sanctions exist | <input type="checkbox"/> Complaints investigation and misconduct hearings are separate processes.<br><br><input type="checkbox"/> A range of disciplinary measures (e.g. penalties, sanctions, conditions) exist.<br><br><input type="checkbox"/> Appeals processes are available and accessible.   | <input type="checkbox"/> The processes and documentation of complaints and sanctions are transparent.<br><br><input type="checkbox"/> Processes and timelines are in place to review and remove penalties and sanctions.<br><br><input type="checkbox"/> Processes are in place for members of the public to lodge a complaint. | <input type="checkbox"/> Professional conduct standards align with regional standards or global guidelines.<br><br><input type="checkbox"/> The complaint management process is regularly evaluated for transparency and timeliness.<br><br><input type="checkbox"/> Information on complaints and sanctions is available to the public. |

Additional File 1, the RFF, is reprinted from *Evaluation and Program Planning*, 46, McCarthy, C. F., Kelley, M. A., Verani, A. R., St Louis, M. E., & Riley, P.L. “Development of a framework to measure health profession regulation strengthening,” p. 20. doi:10.1016/j.evalprogplan.2014.04.008 (2014), with permission from Elsevier: <https://www.sciencedirect.com/science/article/pii/S0149718914000470>.
