# Supplementary material for: Evaluation of the impact of the ARC program on national nursing and midwifery regulations, leadership, and organizational capacity in East, Central, and Southern Africa
Source: BMC Health Serv Res. 2018 Jun 4;18:406. doi: 10.1186/s12913-018-3233-4 (PMC5987602; doi:10.1186/s12913-018-3233-4)
Supplement: Supplementary file 2 — Regional ARC Summative Congresses and Learning Sessions, 2011–2016 (PDF 196 kb) [file 12913_2018_3233_MOESM2_ESM.pdf]

**Additional File 2: Regional ARC Summative Congresses and Learning Sessions, 2011-2016 [44]**

|               | <b>SUMMATIVE<br/>CONGRESS</b>                     | <b>1<sup>ST</sup> LEARNING SESSION</b>         | <b>2<sup>ND</sup> LEARNING SESSION</b>   |
|---------------|---------------------------------------------------|------------------------------------------------|------------------------------------------|
| <b>YEAR 1</b> | Nairobi, Kenya<br>28 February to 2 March 2011     | Durban, South Africa<br>24-26 June 2011        | Arusha, Tanzania<br>5-7 October 2011     |
| <b>YEAR 2</b> | Johannesburg, South Africa<br>20-22 June 2012     | Pretoria, South Africa<br>18-20 September 2012 | Gaborone, Botswana<br>6-8 February 2013  |
| <b>YEAR 3</b> | Nairobi, Kenya<br>30 July to 2 August 2013        | Nairobi, Kenya<br>4-6 February 2014            | Lusaka, Zambia<br>29 April to 1 May 2014 |
| <b>YEAR 4</b> | Windhoek, Namibia<br>24-26 February 2015          | Johannesburg, South Africa<br>14-16 July 2015  | Harare, Zimbabwe<br>10-12 November 2015  |
| <b>YEAR 5</b> | Johannesburg, South Africa<br>16-18 February 2016 |                                                |                                          |
